# Supplementary material for: Molecular Epidemiology of Rotavirus A Strains Pre- and Post-Vaccine (Rotarix®) Introduction in Mozambique, 2012–2019: Emergence of Genotypes G3P[4] and G3P[8]
Source: MDPI journal article supplement (doi:10.3390/pathogens9090671), 2020-08-19
Supplement: s1 [file s1]

## Supplementary Tables

**Supplementary Table 1.** Total number of stool samples collected at sentinel sites in Mozambique during surveillance between May 2014 and December 2019

| <sup>1</sup> Period | Year              | Total stool samples | Rotavirus positive |      | Genotyped samples |       |
|---------------------|-------------------|---------------------|--------------------|------|-------------------|-------|
|                     |                   |                     | n                  | %    | n                 | %     |
| Pre-vaccine         | <sup>2</sup> 2014 | 97                  | 39                 | 40.2 | 33                | 84.6  |
|                     | 2015              | 555                 | 225                | 40.5 | 213               | 94.7  |
| Subtotal            | -                 | 652                 | 264                | 40.5 | 246               | 93.2  |
| Post-vaccine        | 2016              | 359                 | 46                 | 12.8 | 39                | 84.8  |
|                     | 2017              | 363                 | 104                | 28.7 | 104               | 100.0 |
|                     | 2018              | 223                 | 34                 | 15.2 | 31                | 91.2  |
|                     | 2019              | 139                 | 20                 | 14.4 | 20                | 100.0 |
| Subtotal            | -                 | 1084                | 204                | 18.8 | 194               | 95.1  |
| Total               | -                 | 1736                | 468                | 27.0 | 440               | 94.0  |

<sup>1</sup>Data published previously by de Deus et al., 2018 was from January 2014 to June 2017 and included six sentinel sites. In the current analyses, only data from five sentinel sites were analysed (Maputo Central Hospital was excluded)

<sup>2</sup>Only data for Mavalane General Hospital is available

**Supplementary Table 2.** Total number of stool samples collected per sentinel sites in Mozambique during surveillance between May 2014 and December 2019

| <sup>2</sup> Period | Year              | <sup>3</sup> Maputo (HGM & HJM) |     |              |     |                   | Nampula (HCN) |              |      |                   |       | Quelimane (HGQ) |              |      |                   |       | <sup>5</sup> Beira (HCB) |              |      |                   |       |
|---------------------|-------------------|---------------------------------|-----|--------------|-----|-------------------|---------------|--------------|------|-------------------|-------|-----------------|--------------|------|-------------------|-------|--------------------------|--------------|------|-------------------|-------|
|                     |                   | <sup>1</sup> SS                 |     | RVA positive |     | Genotyped samples | SS            | RVA positive |      | Genotyped samples |       | SS              | RVA positive |      | Genotyped samples |       | SS                       | RVA positive |      | Genotyped samples |       |
|                     |                   | -                               | n   | %            | n   | %                 | -             | n            | %    | n                 | %     | -               | n            | %    | n                 | %     | -                        | n            | %    | n                 | %     |
| Pre-vaccine         | <sup>4</sup> 2014 | 97                              | 39  | 40.2         | 33  | 84.6              | 0             | 0            | 0    | 0                 | 0     | 0               | 0            | 0    | 0                 | 0     | 0                        | 0            | 0    | 0                 | 0     |
|                     | 2015              | 325                             | 142 | 43.7%        | 141 | 99.3              | 192           | 67           | 34.9 | 59                | 88.1  | 20              | 8            | 40.0 | 8                 | 100.0 | 18                       | 6            | 33.3 | 5                 | 83.3  |
| Subtotal            | -                 | 422                             | 181 | 42.9         | 174 | 96.1              | 192           | 67           | 34.9 | 59                | 88.1  | 20              | 8            | 40.0 | 8                 | 100.0 | 18                       | 6            | 33.3 | 5                 | 83.3  |
| Post-vaccine        | 2016              | 68                              | 9   | 13.2         | 9   | 100.0             | 198           | 29           | 14.6 | 23                | 79.3  | 48              | 6            | 12.5 | 5                 | 83.3  | 45                       | 2            | 4.4  | 2                 | 100.0 |
|                     | 2017              | 154                             | 37  | 24.0         | 37  | 100.0             | 120           | 49           | 40.8 | 49                | 100.0 | 60              | 16           | 26.7 | 14                | 87.5  | 29                       | 4            | 13.8 | 4                 | 100.0 |
|                     | 2018              | 124                             | 20  | 16.1         | 18  | 90.0              | 55            | 8            | 14.5 | 8                 | 100.0 | 19              | 4            | 21.1 | 4                 | 100.0 | 25                       | 2            | 8.0  | 1                 | 50.0  |
|                     | 2019              | 62                              | 7   | 11.3         | 7   | 100.0             | 50            | 10           | 20.0 | 10                | 100.0 | 27              | 3            | 11.1 | 3                 | 100.0 | 0                        | 0            | 0    | 0                 | 0     |
| Subtotal            | -                 | 408                             | 73  | 17.9         | 71  | 97.3              | 423           | 96           | 22.7 | 90                | 93.8  | 154             | 29           | 18.8 | 26                | 89.7  | 99                       | 8            | 8.1  | 7                 | 87.5  |
| Total               | -                 | 830                             | 254 | 30.6         | 245 | 96.5              | 615           | 163          | 26.5 | 149               | 91.4  | 174             | 37           | 21.3 | 34                | 91.9  | 117                      | 14           | 12.0 | 12                | 80.7  |

<sup>1</sup>SS-Stool samples; RVA – Group A rotavirus

<sup>2</sup>Data published previously by de Deus et al., 2018 was from January 2014 to June 2017 and included six sentinel sites. In the current analyses, only data from five sentinel sites were analysed (Maputo Central Hospital was excluded)

<sup>3</sup>In Maputo: samples were collected at two sentinel sites (Mavalane General Hospital since May 2014) and Jose Macamo General Hospital (March of 2015), in Nampula (Nampula Central Hospital, since March 2015), in Quelimane (Quelimane General Hospital, since October of 2015) and Beira (Beira Central Hospital, since June of 2015)

<sup>4</sup>Only data for Mavalane General Hospital is available

<sup>5</sup>No, samples were collected in 2019 in Beira

**Supplementary Table 3.** Total number of stool samples collected at Mavalane General Hospital during a cross-sectional study (2012-2013) and the National Surveillance of Diarrhoea program (2014-2019)

| Period       | Year              | Total stool samples | Rotavirus positive |      | Genotyped samples |       |
|--------------|-------------------|---------------------|--------------------|------|-------------------|-------|
|              |                   |                     | n                  | %    | n                 | %     |
| Pre-vaccine  | <sup>1</sup> 2012 | 165                 | 74                 | 44.8 | 67                | 90.5  |
|              | <sup>2</sup> 2013 | 70                  | 25                 | 35.7 | 24                | 96.0  |
|              | 2014              | 97                  | 39                 | 40.2 | 33                | 84.6  |
|              | 2015              | 184                 | 76                 | 41.3 | 76                | 100.0 |
| Subtotal     | -                 | 516                 | 214                | 41.5 | 200               | 93.5  |
| Post-vaccine | 2016              | 46                  | 9                  | 19.6 | 9                 | 100.0 |
|              | 2017              | 77                  | 12                 | 15.6 | 11                | 91.7  |
|              | 2018              | 82                  | 16                 | 19.5 | 16                | 100.0 |
|              | 2019              | 59                  | 7                  | 11.9 | 7                 | 100.0 |
| Subtotal     | -                 | 264                 | 44                 | 16.7 | 43                | 97.7  |
| Total        | -                 | 780                 | 258                | 33.1 | 243               | 94.2  |

<sup>1,2</sup>Samples collected in the cross-sectional study during 2012-2013 (de Deus et al., 2018) and genetic characterization of rotavirus strains was published previously (João, et al., 2018)

**Supplementary Table 4.** Geographical distribution of rotavirus genotypes

| Maputo (HGM & HJM)    |             |       |              |       |      |       |      |       |      |       |
|-----------------------|-------------|-------|--------------|-------|------|-------|------|-------|------|-------|
| <sup>1</sup> G/P type | Pre-vaccine |       | Post-vaccine |       |      |       |      |       |      |       |
|                       | 2015        |       | 2016         |       | 2017 |       | 2018 |       | 2019 |       |
|                       | n           | %     | n            | %     | n    | %     | n    | %     | n    | %     |
| G1P[8]                | 8           | 5.7   | 6            | 66.7  | 6    | 16.2  | 0    | 0     | 0    | 0.0   |
| G3P[4]                | 0           | 0     | 1            | 11.1  | 11   | 29.7  | 6    | 33.3  | 0    | 0.0   |
| G3P[8]                | 0           | 0     | 0            | 0     | 0    | 0     | 6    | 33.3  | 7    | 100.0 |
| G9P[4]                | 0           | 0     | 0            | 0     | 2    | 5.4   | 0    | 0     | 0    | 0.0   |
| G9P[6]                | 0           | 0     | 0            | 0     | 0    | 0     | 2    | 11.1  | 0    | 0.0   |
| G2P[6]                | 3           | 2.1   | 0            | 0     | 0    | 0     | 0    | 0     | 0    | 0.0   |
| G9P[8]                | 97          | 68.8  | 0            | 0     | 2    | 5.4   | 1    | 5.6   | 0    | 0.0   |
| Other genotypes       | 3           | 2.1   | 1            | 11.1  | 5    | 13.5  | 3    | 16.7  | 0    | 0.0   |
| Mixed type            | 0           | 0     | 1            | 11.1  | 0    | 0     | 0    | 0     | 0    | 0.0   |
| Partial G/P types     | 18          | 12.7  | 0            | 0     | 6    | 16.2  | 0    | 0     | 0    | 0.0   |
| Untypeables           | 12          | 8.5   | 0            | 0     | 5    | 13.5  | 0    | 0     | 0    | 0.0   |
| Total                 | 141         | 100.0 | 9            | 100.0 | 37   | 100.0 | 18   | 100.0 | 7    | 100.0 |
| Nampula (HCN)         |             |       |              |       |      |       |      |       |      |       |
| <sup>2</sup> G/P type |             |       |              |       |      |       |      |       |      |       |
| G1P[8]                | 46          | 78.0  | 10           | 43.5  | 11   | 22.4  | 0    | 0     | 3    | 30.0  |
| G3P[4]                | 0           | 0.0   | 0            | 0.0   | 1    | 2.0   | 4    | 50.0  | 1    | 10.0  |
| G3P[8]                | 0           | 0.0   | 0            | 0.0   | 0    | 0.0   | 0    | 0.0   | 2    | 20.0  |
| G9P[4]                | 0           | 0.0   | 3            | 13.0  | 16   | 32.7  | 1    | 12.5  | 0    | 0.0   |
| G9P[6]                | 0           | 0.0   | 5            | 21.7  | 4    | 8.2   | 1    | 12.5  | 0    | 0.0   |
| G2P[6]                | 6           | 10.2  | 4            | 17.4  | 0    | 0.0   | 0    | 0.0   | 0    | 0.0   |
| G9P[8]                | 1           | 1.7   | 0            | 0.0   | 1    | 2.0   | 0    | 0.0   | 0    | 0.0   |
| Other genotypes       | 1           | 1.7   | 0            | 0.0   | 1    | 2.0   | 0    | 0.0   | 0    | 0.0   |
| Mixed type            | 0           | 0.0   | 0            | 0.0   | 10   | 20.4  | 0    | 0.0   | 0    | 0.0   |
| Partial G/P types     | 4           | 6.8   | 0            | 0.0   | 5    | 10.2  | 2    | 25.0  | 2    | 20.0  |
| Untypeables           | 1           | 1.7   | 1            | 4.3   | 0    | 0.0   | 0    | 0.0   | 2    | 20.0  |
| Total                 | 59          | 100.0 | 23           | 100.0 | 49   | 100   | 8    | 100.0 | 10   | 100.0 |
| Quelimane (HGQ)       |             |       |              |       |      |       |      |       |      |       |
| <sup>3</sup> G/P type |             |       |              |       |      |       |      |       |      |       |
| G1P[8]                | 8           | 100.0 | 1            | 20.0  | 2    | 14.3  | 0    | 0.0   | 0    | 0.0   |
| G3P[4]                | 0           | 0.0   | 0            | 0.0   | 1    | 7.1   | 1    | 25.0  | 0    | 0.0   |
| G3P[8]                | 0           | 0.0   | 0            | 0.0   | 0    | 0.0   | 1    | 25.0  | 3    | 100.0 |
| G9P[4]                | 0           | 0.0   | 0            | 0.0   | 2    | 14.3  | 0    | 0.0   | 0    | 0.0   |
| G9P[6]                | 0           | 0.0   | 0            | 0.0   | 5    | 35.7  | 0    | 0.0   | 0    | 0.0   |
| G2P[6]                | 0           | 0.0   | 2            | 40.0  | 0    | 0.0   | 1    | 25.0  | 0    | 0.0   |
| G9P[8]                | 0           | 0.0   | 0            | 0.0   | 3    | 21.4  | 0    | 0.0   | 0    | 0.0   |
| Other genotypes       | 0           | 0.0   | 1            | 20.0  | 0    | 0.0   | 1    | 25.0  | 0    | 0.0   |
| Mixed type            | 0           | 0.0   | 1            | 20.0  | 0    | 0.0   | 0    | 0.0   | 0    | 0.0   |
| Partial G/P types     | 0           | 0.0   | 0            | 0     | 1    | 7.1   | 0    | 0.0   | 0    | 0.0   |
| Total                 | 8           | 100.0 | 5            | 100.0 | 14   | 100.0 | 4    | 100.0 | 3    | 100.0 |
| Beira (HCB)           |             |       |              |       |      |       |      |       |      |       |
| <sup>4</sup> G/P type |             |       |              |       |      |       |      |       |      |       |
| G1P[8]                | 4           | 80.0  | 0            | 0.0   | 1    | 25.0  | 0    | 0.0   | 0    | 0.0   |
| G3P[4]                | 0           | 0.0   | 0            | 0.0   | 1    | 25.0  | 1    | 100.0 | 0    | 0.0   |
| G2P[4]                | 0           | 0.0   | 1            | 50.0  | 0    | 0.0   | 0    | 0.0   | 0    | 0.0   |
| G2P[6]                | 0           | 0.0   | 1            | 50.0  | 0    | 0.0   | 0    | 0.0   | 0    | 0.0   |
| Partial G/P types     | 1           | 20.0  | 0            | 0.0   | 2    | 50.0  | 0    | 0.0   | 0    | 0.0   |
| Total                 | 5           | 100.0 | 2            | 0.0   | 4    | 100.0 | 1    | 100.0 | 0    | 0.0   |

<sup>1</sup> Maputo: 2015 – Other genotypes: G12P[8] (1.4%), G2P[4] (0.7%), Partial G/P types: G9P[x] (5.0%), GxP[6] (0.7%), GxP[8] (7.1%); 2016 – Other genotypes : G12P[4] (11.1%), Mixed type : G12G3P[4]; 2017- Other genotypes : G1P[4] (5.4%), G3P[6] (5.4%), G8P[4] (2.7%); 2018 - Other genotypes: G2P[4] (5.6%), G8P[4] (11.1%)

<sup>2</sup> Nampula: 2015 – Other genotypes: G1P[6] (1.7%); 2017 – Other genotypes: G12P[8] (2.0%); Mixed type: G3G1P[8] (8.2%), G3G9P6 (12.2%); Partial G/P types: G9P[x] (2.0%), GxP[6] (2.0%), GxP[4] (6.1%); 2018 – Other genoPartial G/P types: GxP[4] (12.5%), GxP[6] (12.5%); 2019 - Partial G/P types: GxP[4] (10.0%), GxP[8] (10.0%)

<sup>3</sup> Quelimane: 2016 – Other genotypes: G2P[4] (20.0%); Mixed type: G2G1P[8] (20.0%); 2017 – Partial G/P type: GxP[6] (7.1%); 2018 - Other genotypes: G3P[6] (25.0%)

<sup>4</sup> Beira: 2015 - Partial G/P types: GxP[8] 1 (20.0%); 2017 - Partial G/P types: G9P[x] (25.0%), GxP[8] (25.0%)
